# Supplementary material for: Antitumor effects of a Sb-rich polyoxometalate on non-small-cell lung cancer by inducing ferroptosis and apoptosis
Source: Royal Society of Chemistry journal article supplement (doi:10.1039/d4sc03856h), 2024-01-01
Supplement: d4sc03856h1.pdf [file d4sc03856h1.pdf]

## Antitumor Effects of a Sb-rich Polyoxometalate on Non-Small-Cell Lung Cancer by Inducing Ferroptosis and Apoptosis†

Jie-Wei Lin<sup>‡a</sup>, Yang Zhou<sup>‡bc</sup>, Hui-Ping Xiao<sup>‡b</sup>, Lei-Lei Wu<sup>d</sup>, Peng-Cheng Li,<sup>e</sup> Ming-Dong Huang,<sup>bc</sup> Dong Xie<sup>\*a</sup>, Peng Xu<sup>\*c</sup>, Xin-Xiong Li<sup>\*b</sup>, Zhi-Xin Li<sup>\*a</sup>

<sup>a</sup> Department of Thoracic Surgery, Shanghai Pulmonary Hospital, School of Medicine, Tongji University, Shanghai 200433, China. E-mail: [saklizhixin@163.com](mailto:saklizhixin@163.com); [kongduxd@163.com](mailto:kongduxd@163.com)

<sup>b</sup> College of Chemistry, Fuzhou University, Fuzhou, Fujian 350108, China. E-mail: [lxu@fzu.edu.cn](mailto:lxu@fzu.edu.cn)

<sup>c</sup> College of Biological Science and Engineering, Fuzhou University, Fuzhou, Fujian 350108, China. E-mail: [pengxu@fzu.edu.cn](mailto:pengxu@fzu.edu.cn)

<sup>d</sup> Department of Thoracic Surgery, Zhejiang Cancer Hospital, Hangzhou Institute of Medicine (HIM), Chinese Academy of Sciences, Hangzhou, Zhejiang 310005, China.

<sup>e</sup> Shanghai Tumor Hospital, Fudan University, Shanghai 200032, China.

†Electronic Supplementary Information (ESI) available: Synthetic details, structural figures, and spectrum data. See DOI: 10.1039/x0xx00000x

‡Jie-Wei Lin, Yang Zhou and Hui-Ping Xiao contributed equally to this work.

\*Correspondence: [kongduxd@163.com](mailto:kongduxd@163.com); [pengxu@fzu.edu.cn](mailto:pengxu@fzu.edu.cn); [saklizhixin@163.com](mailto:saklizhixin@163.com).

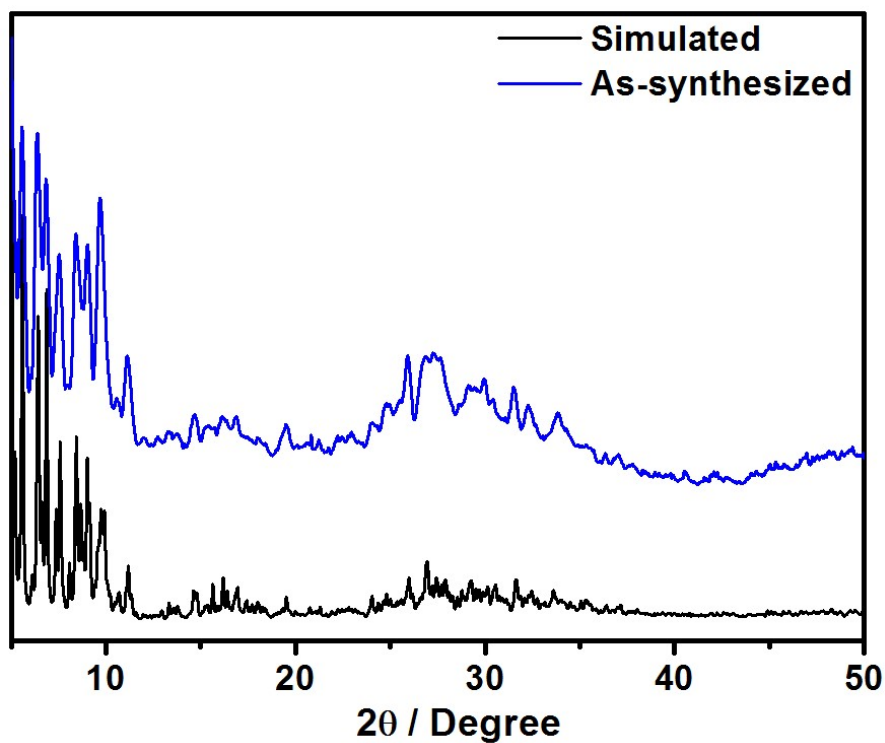

Fig. S1. The simulated and as-synthesized powder X-ray diffraction patterns of POM-1.

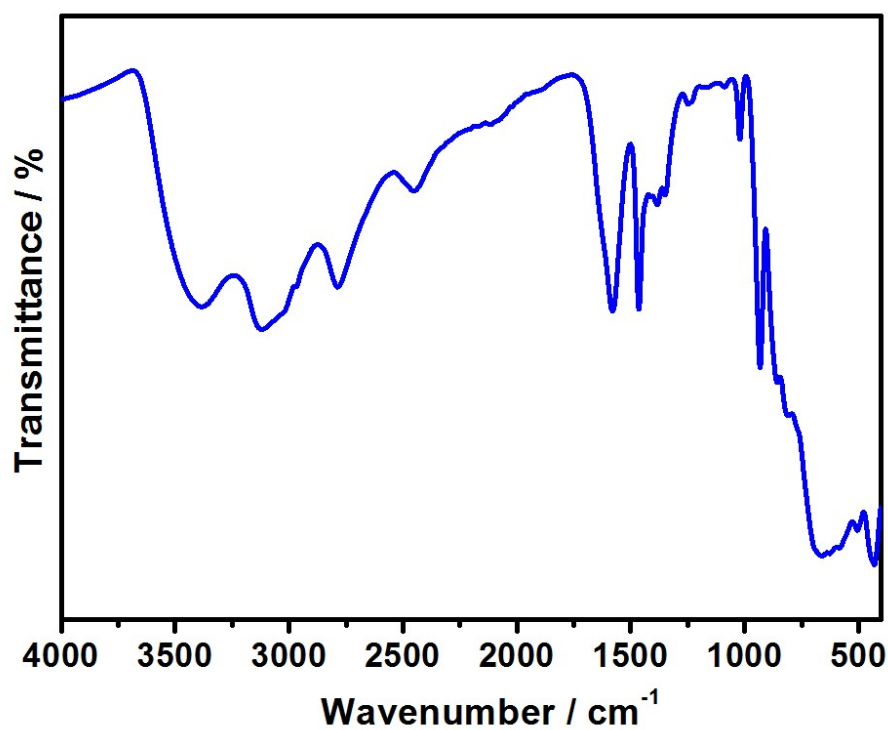

Fig. S2. FT-IR spectrometry of POM-1.

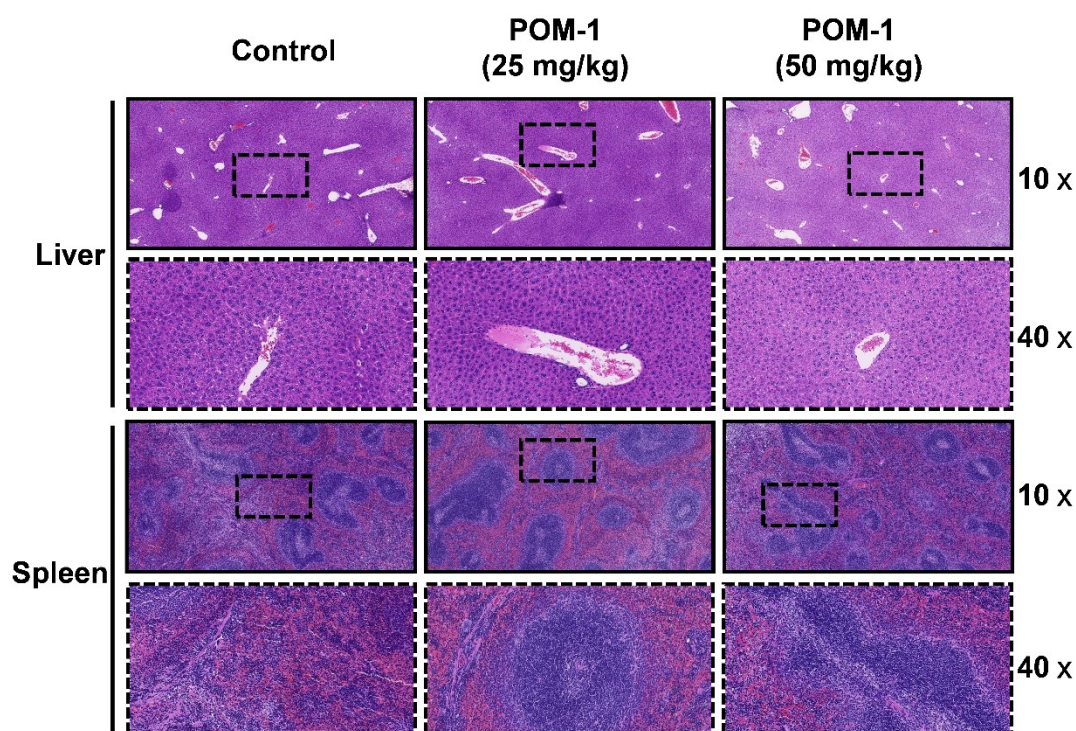

Fig. S3. HE staining of liver and spleen dissected from the mice at 17 days of treatment in each group.

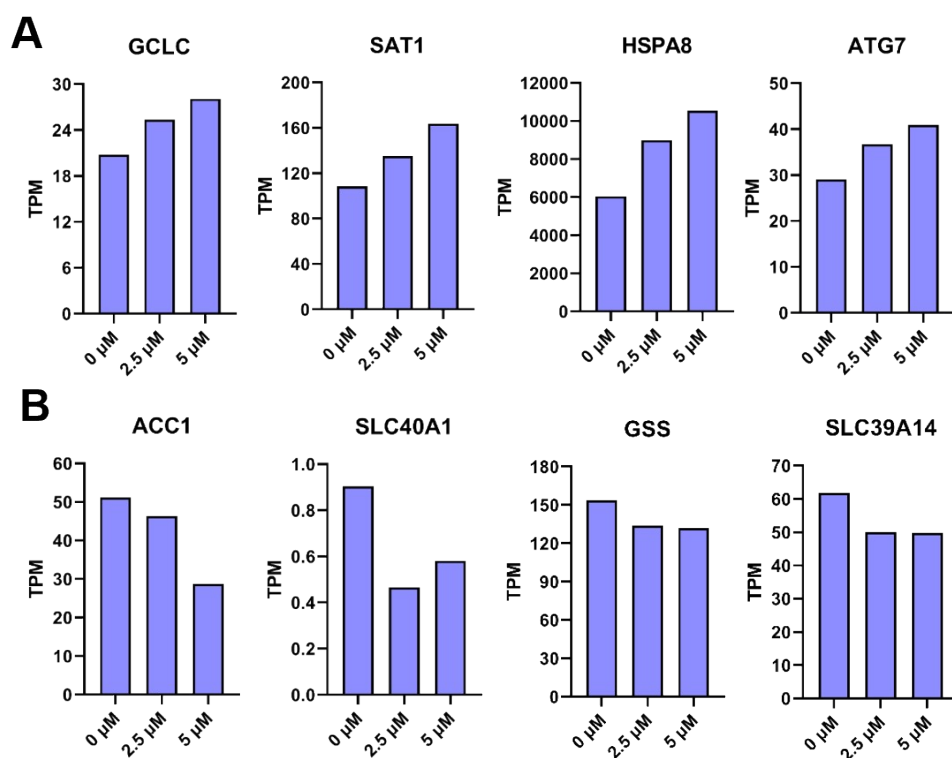

Fig. S4. Up-regulated (A) and down-regulated (B) DEGs of ferroptosis from POM-1 treated H1299 cells.

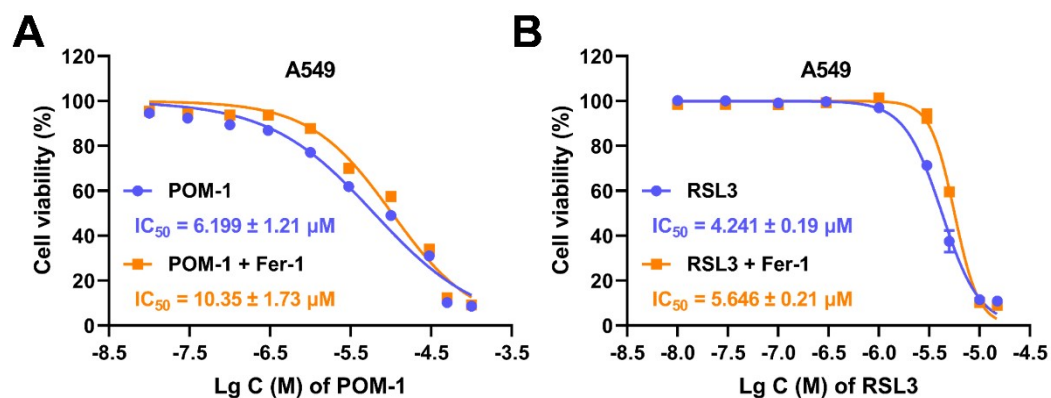

**Fig. S5. POM-1 induced ferroptosis in A549 cells.** (A) POM-1 and (B) RSL3 induced ferroptosis of A549 cells, and the effect of ferroptosis could be mitigated by Ferrostatin-1 (Fer-1).

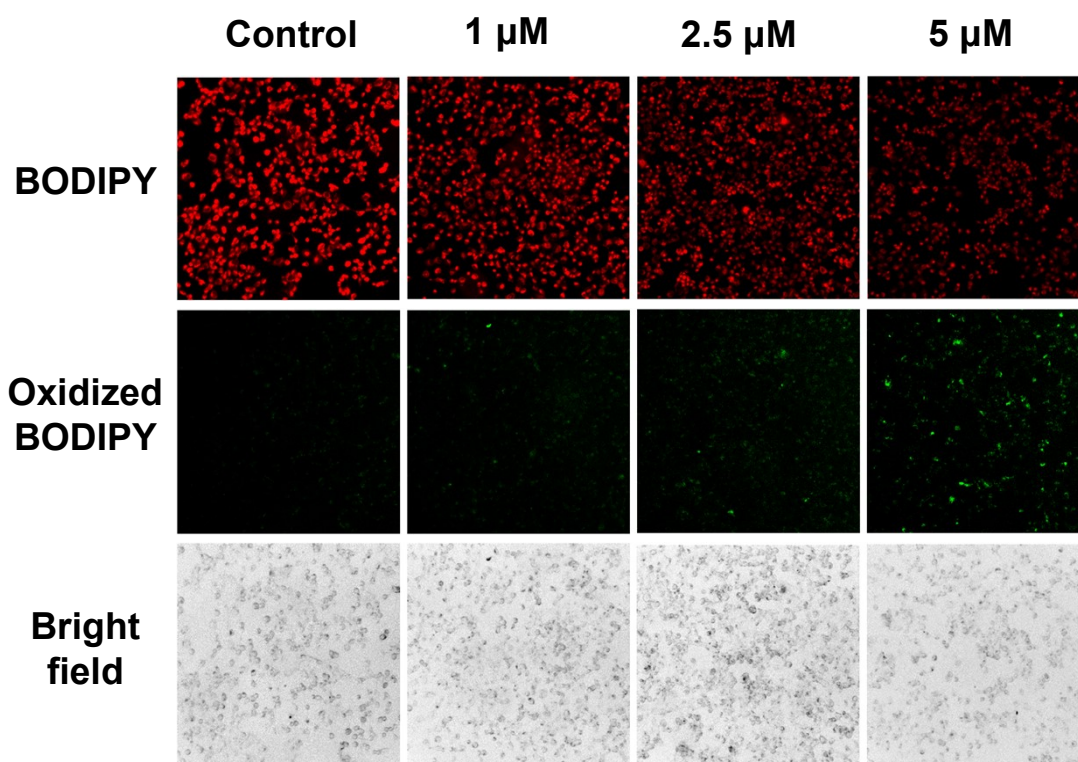

**Fig. S6. Fluorescence microscopy imaging of H1299 cells after POM-1 incubation using C11-BODIPY 581/591.**

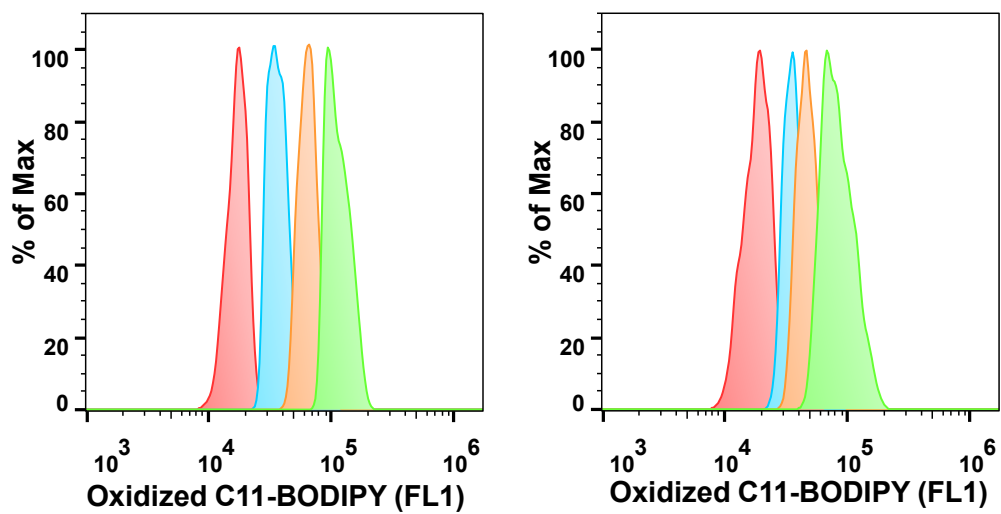

**Fig. S7.** C11-BODIPY 581/591 oxidized probe was quantitatively analyzed using flow cytometer after treatment with different concentrations of POM-1.
